# Supplementary material for: Pathogenic copy number variants that affect gene expression contribute to genomic burden in cerebral palsy
Source: NPJ Genom Med. 2018 Dec 14;3:33. doi: 10.1038/s41525-018-0073-4 (PMC6294788; doi:10.1038/s41525-018-0073-4)
Supplement: Supplementary file 1 — Supplemental Data [file 41525_2018_73_MOESM1_ESM.pdf]

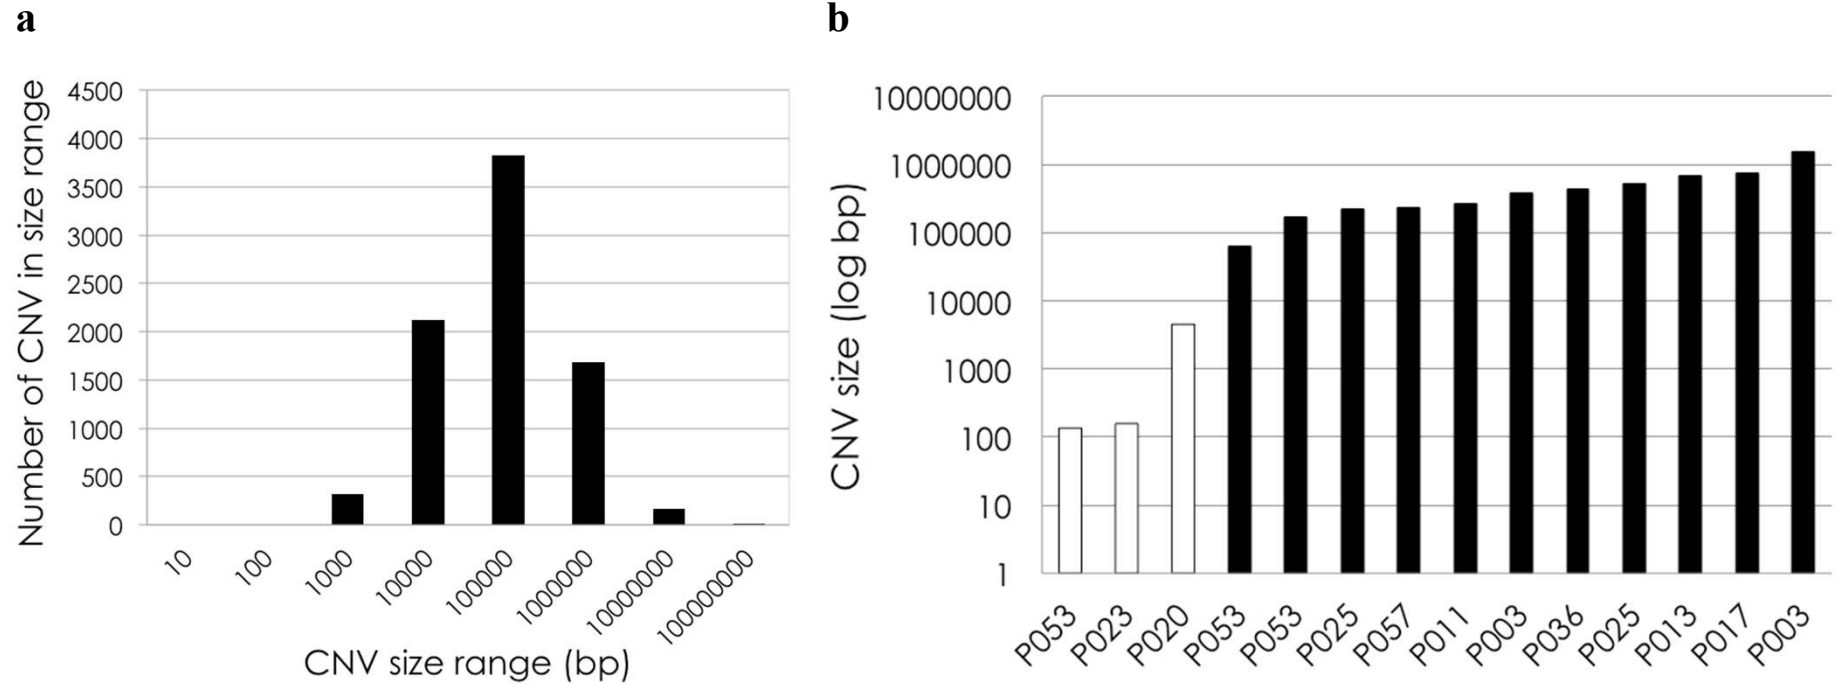

**Figure S1.** Sensitivity and specificity of detection. **a.** Plot of size ranges of CNV detected by CoNIFER. **b.** Plot of previously identified CNV<sup>12</sup> detected (black bars) or not detected (white bars) by CoNIFER.

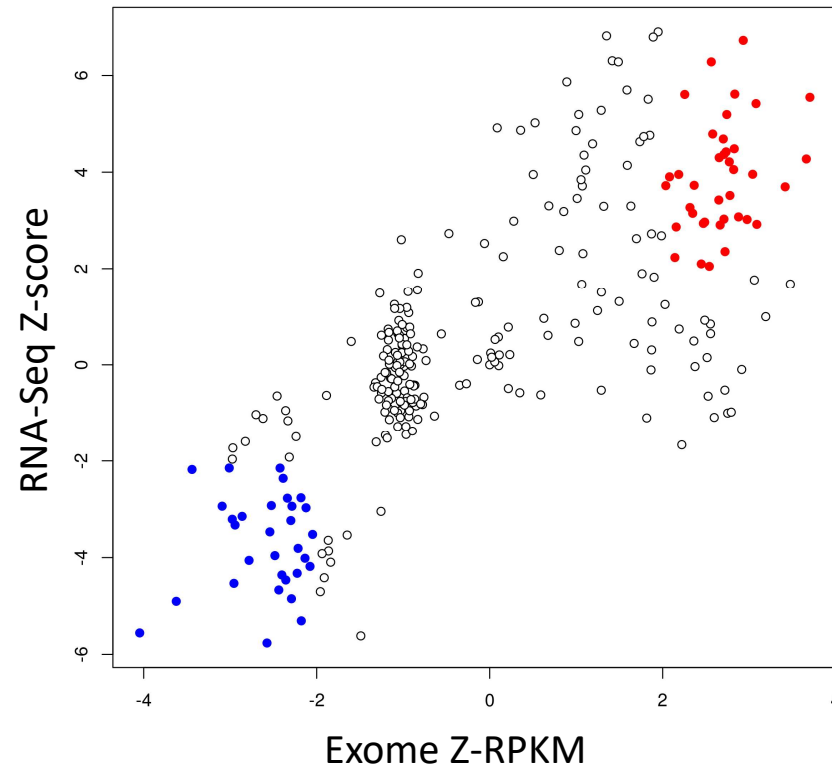

**Figure S2.** Gene dosage and RNA expression are highly correlated. Plot shows correlation (Pearson  $r = 0.75$ ) between gene dosage as measured by average exome Z-RPKM for each gene compared to the RNA-Seq Z-score for that gene of all CNV loci shown in Table 1. Blue and red colouring indicate genes where Z-scores for both RNA-Seq and exome data are less than -2 or greater than 2 respectively.

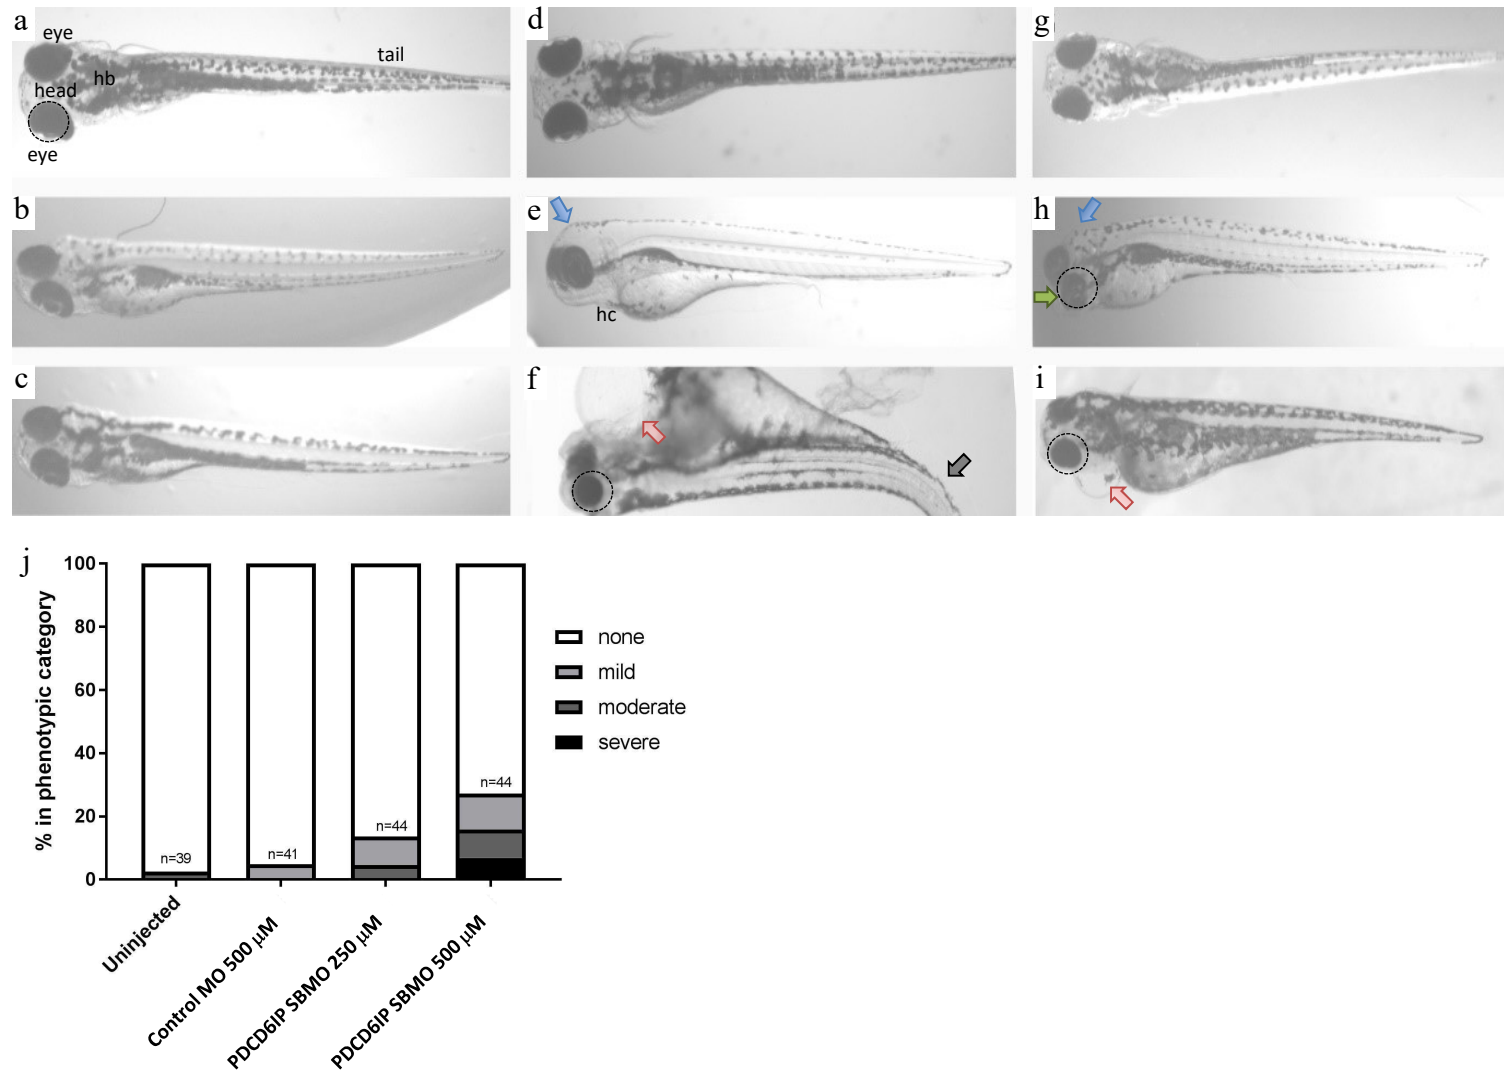

**Figure S3.** PDCD6IP morphants display abnormal brain and heart development. **a-c:** The majority of larvae in the injected control morpholino group had no obvious phenotype. Normal anatomy of the eye, head, hindbrain (hb) tail and heart chamber (hc) are shown (**a**). Mild generalized loss of pigment in normal sized eyes was observed at low frequency in the injected control morpholino group. **d-f:** Representative images showing the phenotypic range in larvae injected with 125 µM of PDCD6IP AUGMO. **g-i:** Representative images showing the phenotypic range in larvae injected with 62.5 µM of PDCD6IP AUGMO. **j.** Larvae injected with PDCD6IP splice blocking morpholino (PDCD6IP SBMO) were classified as having mild, moderate or severe developmental abnormalities depending on whether they had one, two to three, or more than four of the following phenotypes: loss of pigment in eye (green arrow **h**), decreased eye size (dashed circle **h,f,i**), grey matter hindbrain (**e,f**), small head (**h,f,i**), domed cranium (blue arrow **e,h**), cardiac abnormality (red arrow **f,i**), decreased size (**h,f,i**) and tail curvature (grey arrow **f**).

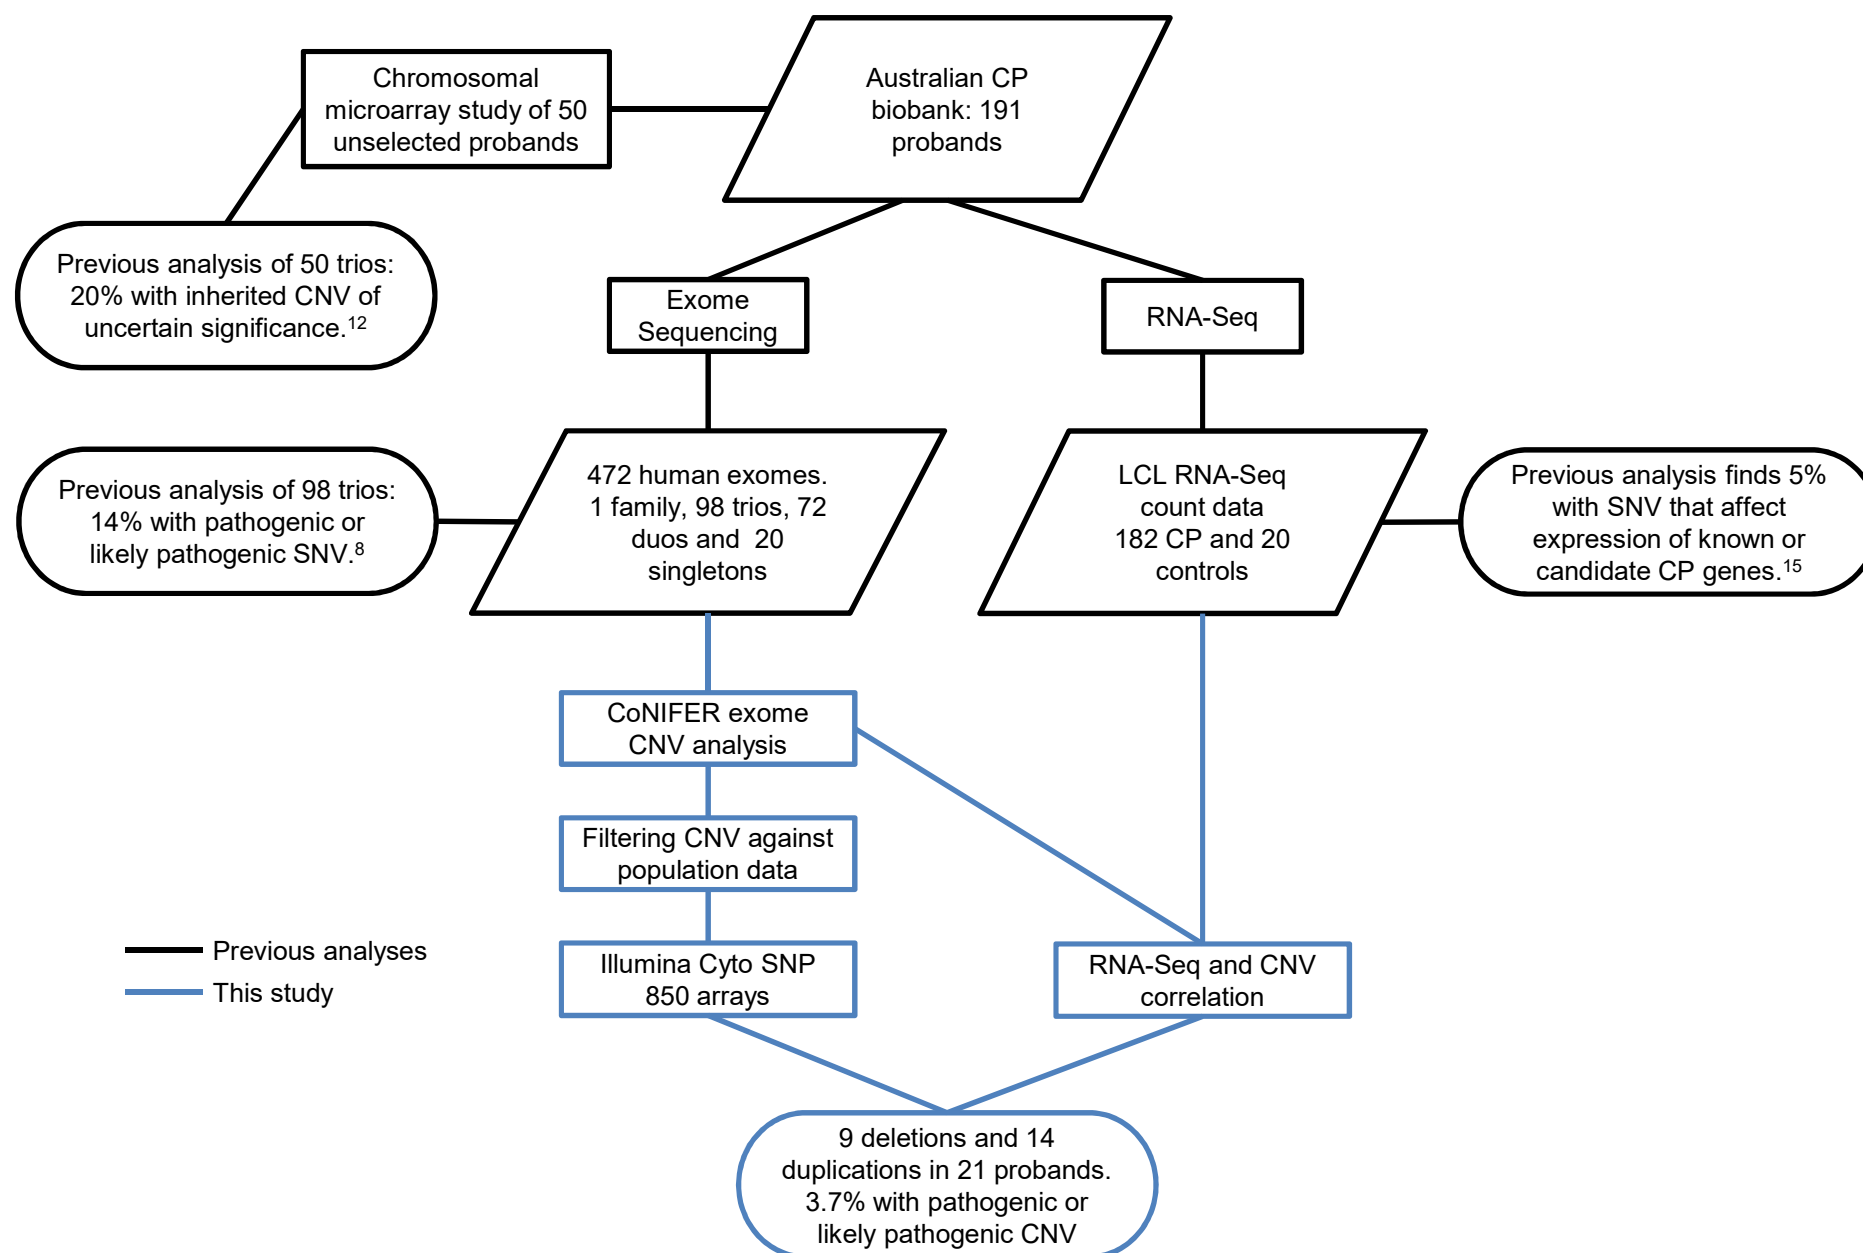

**Figure S4.** Flowchart of the experimental design. Flow chart shows the extent of analyses carried out on the Australian CP biobank. An unselected cohort of 191 individuals with CP and their parents and family where available. Copy number variant (CNV), single nucleotide variant (SNV), Lymphoblastoid cell line (LCL)

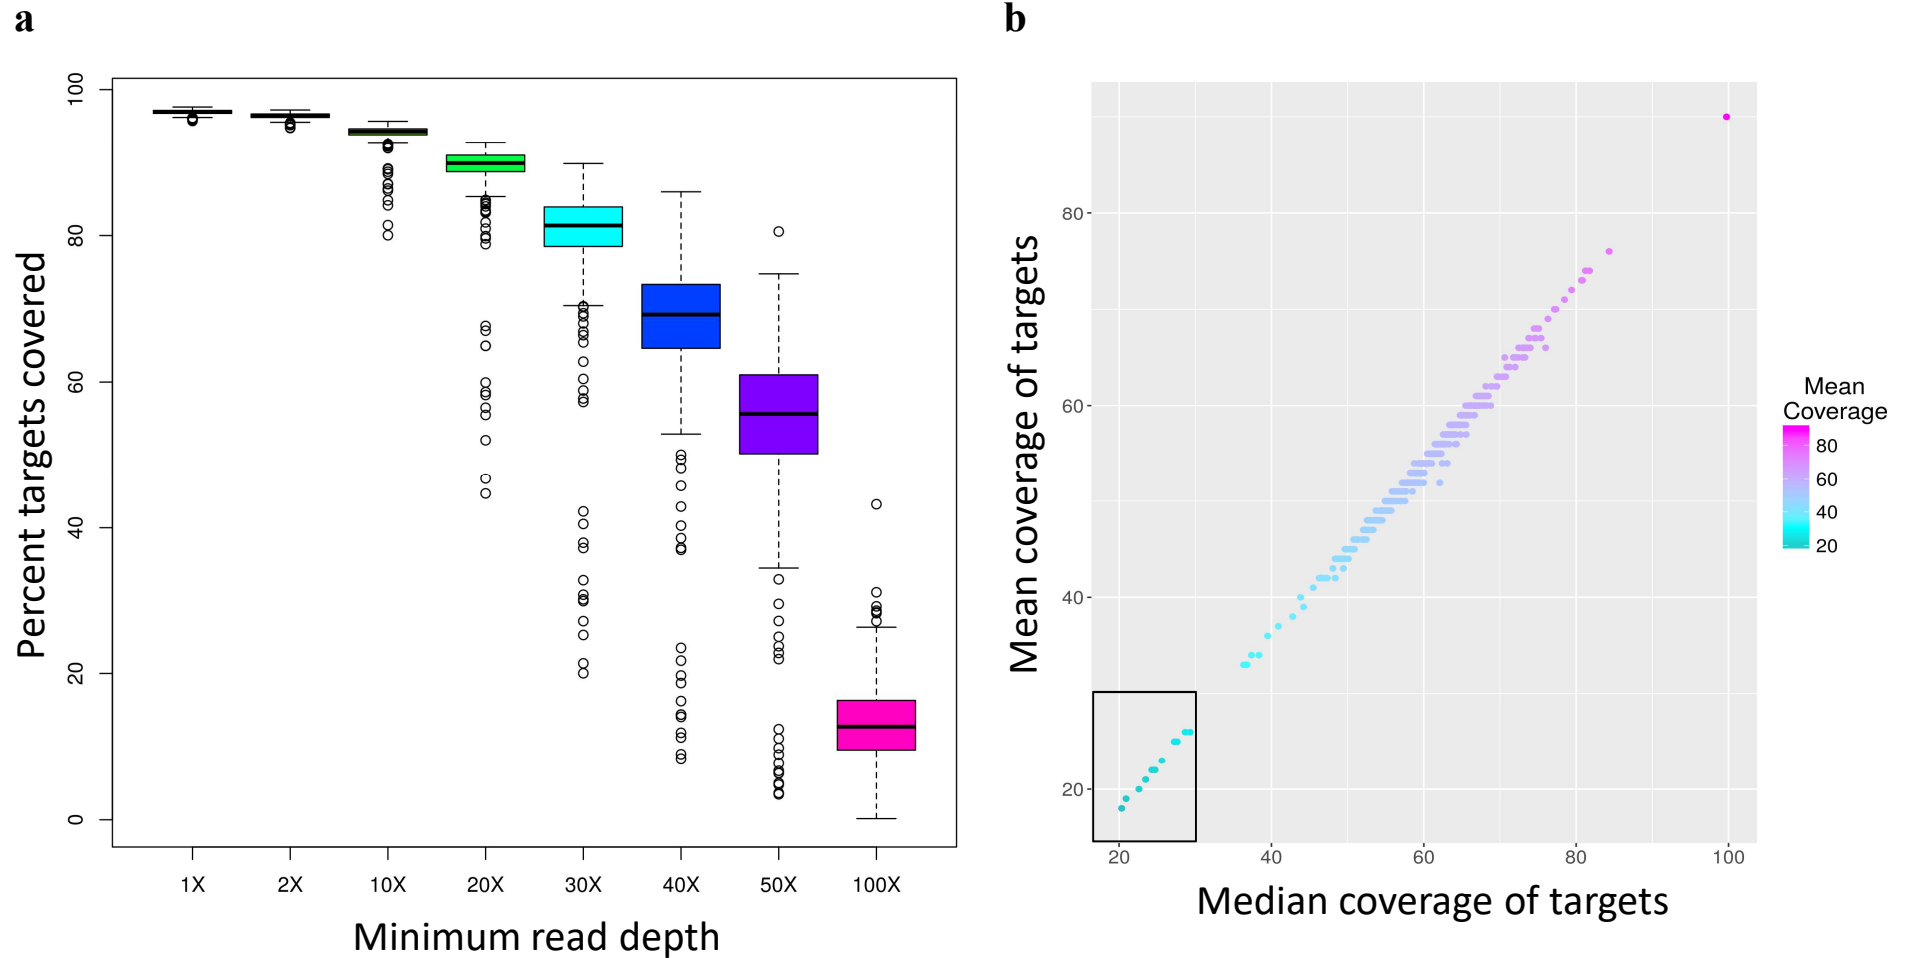

**Figure S5.** Exome quality checks. **a.** boxplot of coverage levels compared to percent of the VCRome V2 exome target coverage, over 75% of samples had better than 30 fold coverage of at least 80% of targets. **b.** Plot of mean vs. median coverage shows slightly higher median coverage values per exome. Boxed area indicates samples with less than 30x mean coverage that were removed from these analyses.

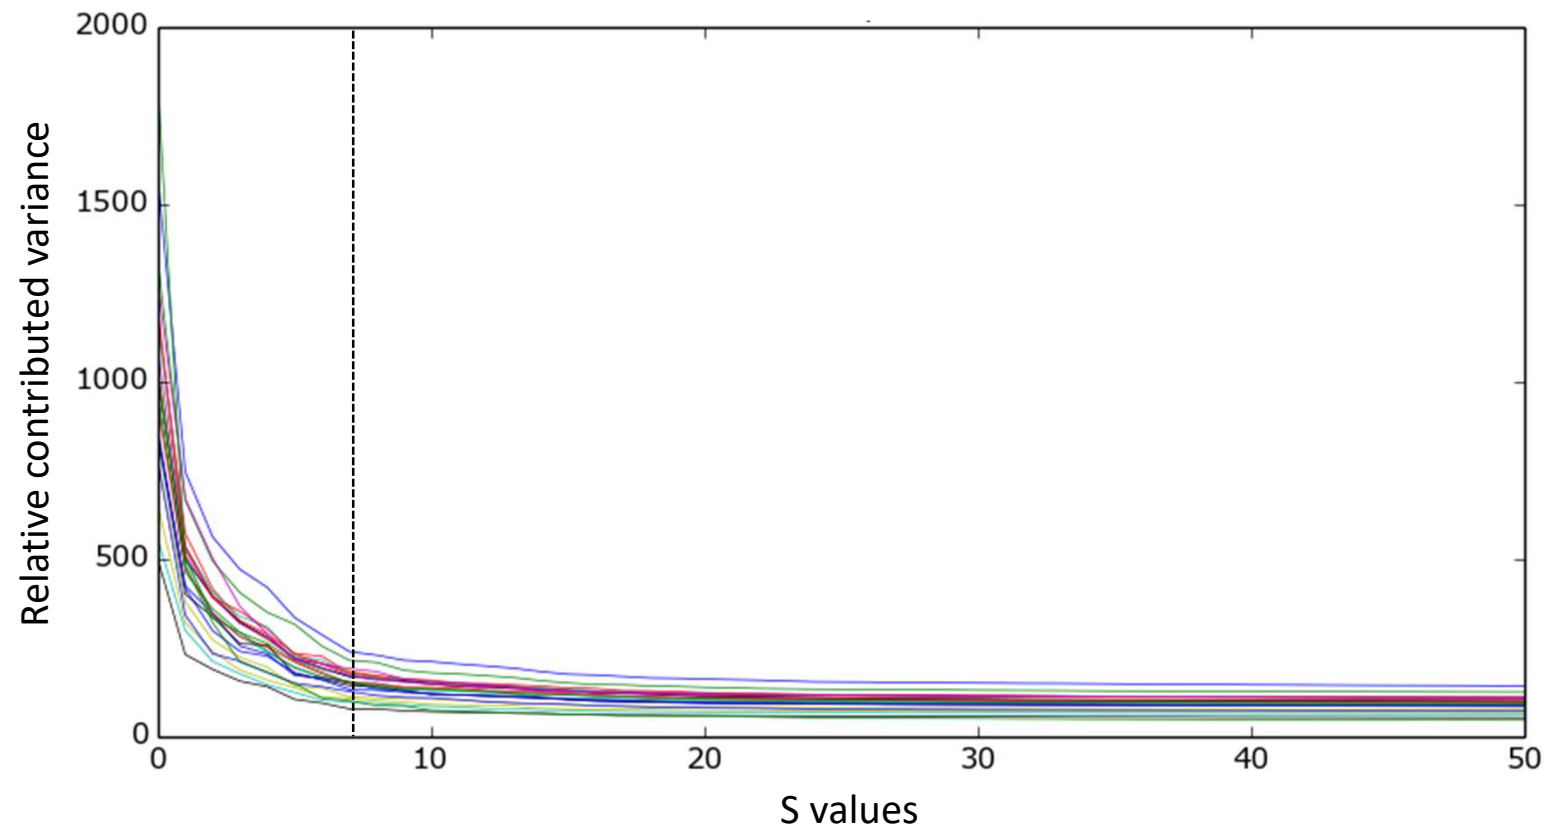

**Figure S6.** Representative plot of first 50 singular (S) for values as calculated by CoNIFER. The relative contributed variance of all CNV is expected to be minor therefore the S values that contribute the majority of relative variance to the initially calculated exome copy number Z-scores can be removed and the Z-scores recalculated based on this. A cut off of 7 was used in this study indicated by the dotted line on the plot which lies at the inflection point in this plot therefore removing the majority of unwanted variance.

Table S24. Additional CNV identified from Illumina CytoSNP 850K arrays

| Sample  | chr   | start     | end       | startSNP    | endSNP      | numSNP | length | Type | Genes                 | RNA-Seq Z-score | pLI  | OMIM   | Brain or LCL Expression      | Pathogenicity prediction and known phenotypes                                                                    |
|---------|-------|-----------|-----------|-------------|-------------|--------|--------|------|-----------------------|-----------------|------|--------|------------------------------|------------------------------------------------------------------------------------------------------------------|
| 101110P | chr2  | 140992793 | 141017744 | rs1038851   | kgp10486793 | 13     | 24,952 | Dup  | <i>LRP1B</i>          |                 | 0.51 |        | Brain                        | Uncertain. No disease association. Knock out mouse normal                                                        |
| 101110P | chr4  | 86986237  | 86998661  | rs59198932  | kgp2418608  | 8      | 12,425 | Dup  | <i>MAPK10</i>         |                 | 0.3  | 602897 | Brain                        | Uncertain. Translocations associated with epilepsy, ID and delayed psychomotor development                       |
| 101110P | chr5  | 24537481  | 24593325  | rs6882202   | rs16893586  | 20     | 55,845 | Dup  | <i>CDH10</i>          |                 | 0.33 |        | Brain                        | Uncertain. No disease association                                                                                |
| 101110P | chr11 | 66789861  | 66816507  | rs7930695   | rs3741190   | 8      | 26,647 | Del  | <i>SYT12</i>          |                 | 0    |        | Brain                        | Uncertain. No disease association                                                                                |
| 120402P | chr2  | 61235855  | 61278696  | rs1182688   | kgp14631098 | 26     | 42,842 | Del  | <i>PEX13</i>          | -1.499          | 0    | 601789 | Brain, LCL                   | Uncertain. Associated with Zellweger syndrome.                                                                   |
| 120402P | chr2  | 140988796 | 141006794 | rs12463968  | kgp24622640 | 12     | 17,999 | Dup  | <i>LRP1B</i>          |                 | 0.51 |        | Brain                        | Uncertain. No disease association. Knock out mouse normal                                                        |
| 120402P | chr2  | 189564693 | 189629741 | rs10173369  | rs13004707  | 14     | 65,049 | Dup  | <i>DIRC1</i>          |                 |      |        | Neither                      | Likely benign. No disease association                                                                            |
| 120402P | chr6  | 102315257 | 102348065 | kgp10227050 | kgp12405634 | 14     | 32,809 | Dup  | <i>GRIK2</i>          |                 | 1    | 138244 | Brain                        | Uncertain. Mental retardation, autosomal recessive 6                                                             |
| 120402P | chr8  | 113959206 | 113975571 | rs11990766  | rs10505197  | 4      | 16,366 | Dup  | <i>CSMD3</i>          |                 | 0.82 |        | Brain                        | Uncertain. No disease association                                                                                |
| 120402P | chr11 | 16250267  | 16259625  | rs12284156  | rs1949480   | 23     | 9,359  | Dup  | <i>SOX6</i>           |                 | 1    | 607257 | Brain                        | Uncertain. Potential involvement in skeletal development                                                         |
| 120402P | chr12 | 21291358  | 21319996  | rs4149016   | rs7973837   | 35     | 28,639 | Dup  | <i>SLCO1B1</i>        |                 | 0    |        | Neither                      | Likely benign. No disease association                                                                            |
| 120402P | chr12 | 21350687  | 21355537  | rs4149062   | rs11045859  | 15     | 4,851  | Dup  | <i>SLCO1B1</i>        |                 | 0    |        | Neither                      | Likely benign. No disease association                                                                            |
| 132414P | chr1  | 98292912  | 98307395  | rs17117249  | kgp6051196  | 9      | 14,484 | Dup  | <i>DPYD</i>           | 1.072           | 0    | 612779 | Brain (low), LCL             | Uncertain. Dihydropyrimidine dehydrogenase deficiency                                                            |
| 132414P | chr8  | 113302023 | 113387333 | rs929686    | rs11785419  | 10     | 85,311 | Dup  | <i>CSMD3</i>          |                 | 0.82 |        | Brain                        | Uncertain. No disease association                                                                                |
| 132414P | chr17 | 73863929  | 73888806  | rs2034947   | rs9916659   | 9      | 24,878 | Del  | <i>TRIM47, TRIM65</i> | NA, 0.546       | 0    |        | Brain, LCL ( <i>TRIM65</i> ) | Uncertain. Supported by homozygosity of exome variants. This locus associated with white matter hyperintensities |
| 143425P | chr3  | 93742842  | 93772810  | rs12629037  | kgp18070011 | 14     | 29,969 | Dup  | <i>ARL13B</i>         | -0.099          | 0    | 608922 | Brain, LCL                   | Uncertain. Joubert syndrome 8                                                                                    |
| 143425P | chr18 | 30528021  | 30556985  | rs11662235  | rs7238802   | 4      | 28,965 | Dup  | <i>CCDC178</i>        |                 | 0    |        | Neither                      | Likely benign. No disease association                                                                            |
| 157439P | chr4  | 91917416  | 92009492  | rs2035116   | rs10023583  | 24     | 92,077 | Dup  | <i>CCSER1</i>         |                 | 0    |        | Brain                        | Uncertain. No disease association                                                                                |
| 157439P | chr6  | 102337555 | 102343504 | exm568572   | rs17784776  | 5      | 5,950  | Dup  | <i>GRIK2</i>          |                 | 1    | 138244 | Brain                        | Uncertain. Mental retardation, autosomal recessive 6                                                             |
| 157439P | chr21 | 22848121  | 22867087  | rs17003875  | rs1380591   | 8      | 18,967 | Dup  | <i>NCAM2</i>          |                 | 0.21 |        | Brain                        | Uncertain. No disease association                                                                                |
| 164446P | chr4  | 167652786 | 167661584 | rs11943562  | rs7678726   | 6      | 8,799  | Dup  | <i>SPOCK3</i>         |                 | 0.06 |        | Brain                        | Uncertain. No disease association                                                                                |
| 165447P | chr2  | 189972818 | 189979778 | rs62184182  | kgp10876808 | 11     | 6,961  | Dup  | <i>COL5A2</i>         |                 | 0    | 120190 | Brain (low)                  | Uncertain. Ehlers-Danlos Syndrome                                                                                |
| 165447P | chr13 | 70388448  | 70419939  | rs2325234   | rs2911506   | 6      | 31,492 | Dup  | <i>KLHL1</i>          |                 | 0    |        | Brain                        | Uncertain. No disease association                                                                                |
| 181463P | chr4  | 70713066  | 70716627  | rs2055533   | rs1220715   | 13     | 3,562  | Dup  | <i>SULT1E1</i>        |                 | 0    |        | Neither                      | Likely benign. No disease association                                                                            |
| 181463P | chr14 | 37966740  | 38018045  | kgp11131101 | kgp19704777 | 22     | 51,306 | Dup  | <i>MIPOL1</i>         |                 | 0    | 606850 | Brain (low)                  | Uncertain. Polydactyly                                                                                           |
| 181463P | chr22 | 37603021  | 37607981  | rs2071710   | rs9610669   | 4      | 4,961  | Del  | <i>SSTR3</i>          | 0.850           | 0    |        | Brain, LCL                   | Uncertain. Supported by homozygosity of exome variants. No disease association                                   |
| 183465P | chr19 | 46268902  | 46273135  | rs2341097   | rs3745804   | 16     | 4,234  | Del  | <i>SIX5</i>           | 1.327           | 0.01 | 600963 | Brain (low), LCL             | Uncertain. Branchiorenal syndrome 2                                                                              |
| 192475P | chr4  | 70713066  | 70716627  | rs2055533   | rs1220715   | 13     | 3,562  | Dup  | <i>SULT1E1</i>        |                 | 0    |        | Neither                      | Likely benign. No disease association                                                                            |

Abbreviations: chr: chromosome, Dup: duplication, Del: deletion, LCL: lymphoblastoid cell line
